# Supplementary material for: Differential Response of Pentanal and Hexanal Exhalation to Supplemental Oxygen and Mechanical Ventilation in Rats
Source: MDPI journal article supplement (doi:10.3390/molecules26092752), 2021-05-07
Supplement: s1 [file s1]

## **Supplementary File 1:**

### **Differential response of pentanal and hexanal exhalation to supplemental oxygen and mechanical ventilation in rats**

Lukas M. Müller-Wirtz <sup>1,3</sup>, Daniel Kiefer <sup>1</sup>, Joshua Knauf <sup>1</sup>, Max Floss <sup>1</sup>, Jonas Doneit <sup>1</sup>, Felix Maurer <sup>1,3</sup>, Beate Wolf <sup>1</sup>, Daniel I. Sessler <sup>2,3</sup>, Thomas Volk <sup>1,3</sup>, Sascha Kreuer <sup>1,3</sup>, Tobias Fink <sup>1,3</sup>

1) Center of **B**reath **R**esearch, Department of Anesthesiology, Intensive Care and Pain Therapy, Saarland University Medical Center, Homburg (Saar), Germany

2) Department of **O**UTCOMES **R**ESearch, Anesthesiology Institute, Cleveland Clinic, Cleveland, OH, USA

3) **O**UTCOMES **R**ESearch Consortium, Cleveland, Ohio, USA.

#### **Corresponding Author:**

Dr. med. Lukas Martin Müller-Wirtz

**CBR** - Center of Breath Research

Department of Anesthesiology, Intensive Care and Pain Therapy

Saarland University Medical Center and Saarland University Faculty of Medicine

66421 Homburg / Saar, Germany

Phone: +4968411622785

Email: lukas.wirtz@uks.eu

ORCID: 0000-0002-7984-1798

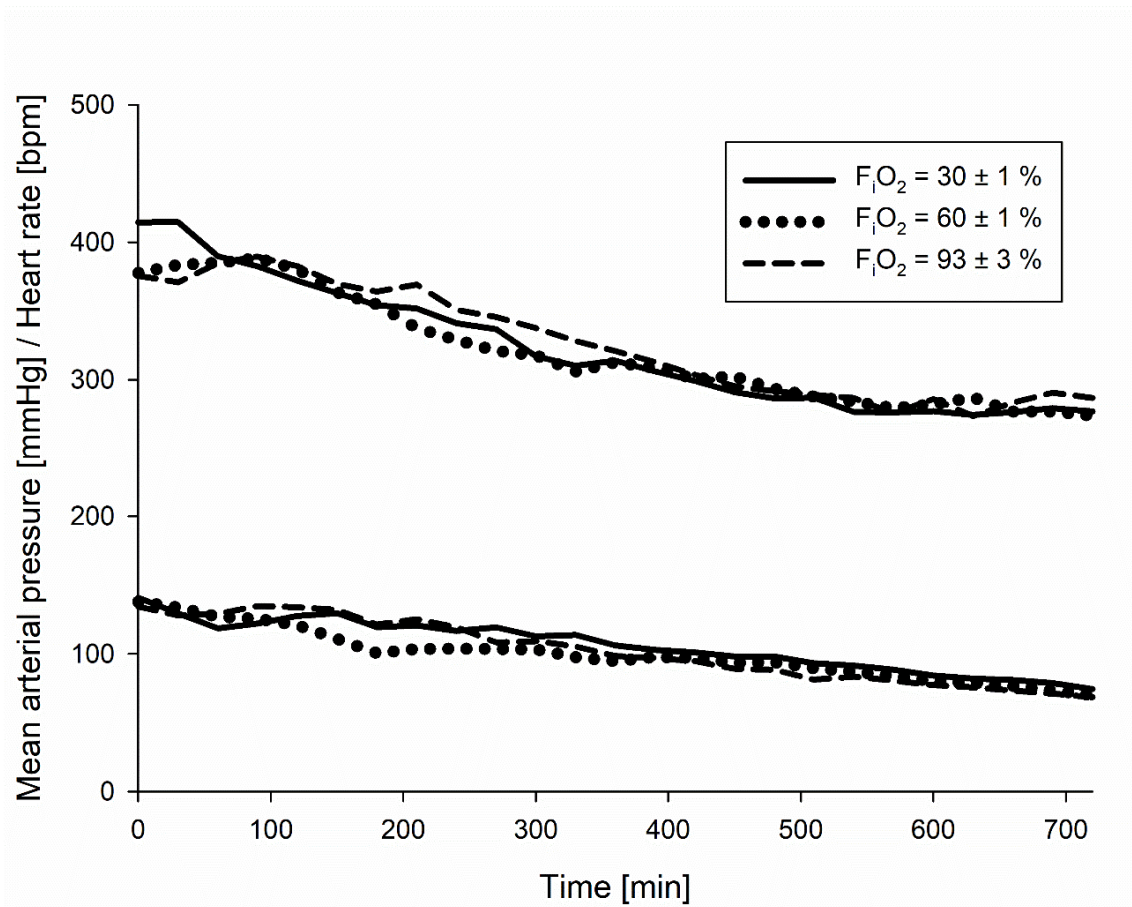

**Figure S1:** Vital parameters

Upper curves represent heart rate and lower curves represent mean arterial pressure. Data presented as medians per groups.

**Table S1:** Results of blood gas analysis

|                                    | Group 1<br>(Inspiratory oxygen fraction: 30%) |                          |                          |                            | Group 2<br>(Inspiratory oxygen fraction: 60%) |                          |                          |                            | Group 3<br>(Inspiratory oxygen fraction: 93%) |                          |                          |                          |
|------------------------------------|-----------------------------------------------|--------------------------|--------------------------|----------------------------|-----------------------------------------------|--------------------------|--------------------------|----------------------------|-----------------------------------------------|--------------------------|--------------------------|--------------------------|
| Time                               | 1 h                                           | 3 h                      | 6 h                      | 12 h                       | 1 h                                           | 3 h                      | 6 h                      | 12 h                       | 1 h                                           | 3 h                      | 6 h                      | 12 h                     |
| <b>pH</b>                          | <b>7.46</b><br>7.42-7.47                      | <b>7.45</b><br>7.43-7.48 | <b>7.44</b><br>7.4-7.46  | <b>7.4</b><br>7.37-7.43    | <b>7.42</b><br>7.4-7.44                       | <b>7.42</b><br>7.42-7.44 | <b>7.44</b><br>7.41-7.45 | <b>7.39</b><br>7.36-7.41   | <b>7.43</b><br>7.41-7.45                      | <b>7.43</b><br>7.39-7.47 | <b>7.42</b><br>7.38-7.43 | <b>7.37</b><br>7.29-7.42 |
| <b>pCO<sub>2</sub></b><br>[mmHg]   | <b>41</b><br>39-44                            | <b>35</b><br>34-37       | <b>35</b><br>32-37       | <b>36</b><br>33-38         | <b>44</b><br>41-45                            | <b>39</b><br>36-41       | <b>39</b><br>34-40       | <b>40</b><br>37-41         | <b>45</b><br>42-46                            | <b>39</b><br>38-40       | <b>37</b><br>36-41       | <b>39</b><br>38-42       |
| <b>pO<sub>2</sub></b><br>[mmHg]    | <b>147</b><br>137-162                         | <b>158</b><br>150-166    | <b>161</b><br>149-170    | <b>154</b><br>123-165      | <b>276</b><br>268-282                         | <b>269</b><br>227-282    | <b>262</b><br>238-280    | <b>235</b><br>214-269      | <b>402</b><br>378-413                         | <b>385</b><br>371-420    | <b>393</b><br>337-432    | <b>362</b><br>285-433    |
| <b>Hb</b><br>[g/dL]                | <b>13.2</b><br>12.6-13.8                      | <b>11.6</b><br>10.7-11.9 | <b>10.8</b><br>10.1-10.9 | <b>10.2</b><br>9.2-10.6    | <b>12.9</b><br>12.1-13.8                      | <b>11.8</b><br>11.5-12   | <b>10.8</b><br>10.3-11.4 | <b>9.8</b><br>9.6-10.6     | <b>12.8</b><br>12.4-13.5                      | <b>11.9</b><br>11.2-12.4 | <b>10.9</b><br>10.5-11.7 | <b>9.5</b><br>9.1-10.8   |
| <b>sO<sub>2</sub></b><br>[%]       | <b>97</b><br>97-98                            | <b>98</b><br>97-98       | <b>98</b><br>97-98       | <b>98</b><br>97-98         | <b>98</b><br>98-100                           | <b>99</b><br>98-100      | <b>99</b><br>98-100      | <b>99</b><br>99-100        | <b>99</b><br>99-99                            | <b>99</b><br>99-99       | <b>99</b><br>99-99       | <b>99</b><br>98-99       |
| <b>K<sup>+</sup></b><br>[mmol/L]   | <b>4.5</b><br>4.4-4.6                         | <b>3.9</b><br>3.7-4.2    | <b>3.9</b><br>3.7-4.2    | <b>4.6</b><br>4.3-4.7      | <b>4.8</b><br>4.3-4.8                         | <b>4.2</b><br>3.9-4.4    | <b>4.2</b><br>3.9-4.4    | <b>4.2</b><br>3.8-4.6      | <b>4.5</b><br>4.2-4.8                         | <b>4.1</b><br>3.7-4.6    | <b>4.3</b><br>3.8-4.6    | <b>4.5</b><br>4-5.2      |
| <b>Na<sup>+</sup></b><br>[mmol/L]  | <b>141</b><br>141-141                         | <b>145</b><br>143-146    | <b>144</b><br>143-147    | <b>142</b><br>141-143      | <b>142</b><br>140-143                         | <b>147</b><br>144-147    | <b>147</b><br>145-150    | <b>146</b><br>142-147      | <b>141</b><br>141-143                         | <b>144</b><br>142-144    | <b>143</b><br>141-146    | <b>142</b><br>139-145    |
| <b>Ca<sup>2+</sup></b><br>[mmol/L] | <b>1.1</b><br>1-1.2                           | <b>1.1</b><br>1.1-1.2    | <b>1.1</b><br>1.1-1.2    | <b>1.2</b><br>1.1-1.2      | <b>1.2</b><br>1.1-1.3                         | <b>1.2</b><br>1.2-1.2    | <b>1.2</b><br>1.1-1.2    | <b>1.2</b><br>1.1-1.2      | <b>1.3</b><br>1.2-1.3                         | <b>1.2</b><br>1.1-1.3    | <b>1.1</b><br>1.1-1.2    | <b>1.1</b><br>1.1-1.2    |
| <b>Glucose</b><br>[mg/dL]          | <b>136</b><br>126-145                         | <b>125</b><br>121-133    | <b>120</b><br>112-124    | <b>101</b><br>(96-108)     | <b>130</b><br>123-140                         | <b>127</b><br>116-139    | <b>124</b><br>104-129    | <b>102</b><br>98-108       | <b>141</b><br>131-143                         | <b>132</b><br>124-147    | <b>123</b><br>115-128    | <b>97</b><br>95-114      |
| <b>Lactate</b><br>[mmol/L]         | <b>0.3</b><br>0.2-0.5                         | <b>0.7</b><br>0.6-1      | <b>0.7</b><br>0.5-0.9    | <b>0.5</b><br>0.2-0.5      | <b>0.5</b><br>0.4-0.6                         | <b>0.9</b><br>0.5-1.3    | <b>0.9</b><br>0.6-1.3    | <b>0.6</b><br>0.5-0.6      | <b>0.3</b><br>0.1-0.4                         | <b>0.7</b><br>0.5-0.8    | <b>0.7</b><br>0.5-0.9    | <b>0.4</b><br>0.3-0.5    |
| <b>BE</b><br>[mmol/L]              | <b>4.4</b><br>3.5-6.2                         | <b>1.5</b><br>-0.6-2.3   | <b>-1.2</b><br>-3-0.1    | <b>-2.6</b><br>-4.3-(-1.1) | <b>3.8</b><br>3-4.6                           | <b>1.1</b><br>-0.4-2     | <b>0.4</b><br>-0.5-1.8   | <b>-1.3</b><br>-2.8-(-0.7) | <b>5.6</b><br>3.2-6.6                         | <b>1.5</b><br>0.1-3.3    | <b>-0.6</b><br>-2.1-1.2  | <b>-2.7</b><br>-5.6-0.5  |
| <b>HCO<sub>3</sub></b><br>[mmol/L] | <b>28</b><br>27-29                            | <b>26</b><br>24-27       | <b>24</b><br>23-25       | <b>23</b><br>21-24         | <b>27</b><br>27-28                            | <b>25</b><br>24-26       | <b>25</b><br>24-26       | <b>24</b><br>22-24         | <b>29</b><br>27-30                            | <b>26</b><br>25-27       | <b>24</b><br>23-26       | <b>22</b><br>20-25       |

*Data presented as medians and interquartile ranges.*
